# Supplementary material for: miR-941 as a promising biomarker for acute coronary syndrome
Source: BMC Cardiovasc Disord. 2017 Aug 22;17:227. doi: 10.1186/s12872-017-0653-8 (PMC5568367; doi:10.1186/s12872-017-0653-8)
Supplement: Supplementary file 14 — Original data of Fig. 7: Expression profiles of miR-941 in patients with and without ACS. (XLSX 15 kb) [file 12872_2017_653_MOESM14_ESM.xlsx]

## Sheet: Sheet1
non-ACS vs ACS	9.64667	10.3567	2^(-ΔCt)	0.00124757	0.000762663	Mean 2^(-ΔCt)[Group control ]	0.000903362	0.000903362	Expression	1.38103	0.84425
	11.1533	10.7267		0.000439048	0.000590135		0.000903362	0.000903362		0.486016	0.653266
	8.77667	10.55		0.00228013	0.000667012		0.000903362	0.000903362		2.52405	0.738366
	9.89333	9.42		0.0010515	0.00145981		0.000903362	0.000903362		1.16399	1.61598
	11.48	10.9133		0.000350087	0.000518513		0.000903362	0.000903362		0.387538	0.573981
	10	10.1733		0.000976562	0.000866007		0.000903362	0.000903362		1.08103	0.958649
	10.5167	10.2467		0.000682603	0.000823087		0.000903362	0.000903362		0.755625	0.911138
	11.33	10.67		0.000388446	0.000613776		0.000903362	0.000903362		0.43	0.679435
	10.0033	9.73		0.000974309	0.00117755		0.000903362	0.000903362		1.07854	1.30352
	11.1433	9.49		0.000442102	0.00139067		0.000903362	0.000903362		0.489396	1.53944
	8.67333	9.98667		0.00244944	0.00098563		0.000903362	0.000903362		2.71147	1.09107
	11.32	9.5		0.000391147	0.00138107		0.000903362	0.000903362		0.432991	1.52881
	10.6033	9.88		0.000642804	0.00106126		0.000903362	0.000903362		0.711569	1.17479
	10.16	9.72		0.000874048	0.00118574		0.000903362	0.000903362		0.96755	1.31258
	9.66	9.56		0.00123609	0.00132481		0.000903362	0.000903362		1.36832	1.46653
	9.74	7.88		0.00116941	0.00424506		0.000903362	0.000903362		1.29451	4.69918
	9.65	10.55		0.00124469	0.000667012		0.000903362	0.000903362		1.37784	0.738366
	8.89	10.59		0.00210787	0.000648772		0.000903362	0.000903362		2.33336	0.718175
	10.1	9.58667		0.000911165	0.00130055		0.000903362	0.000903362		1.00864	1.43967
	11.23	10.3067		0.000416326	0.000789558		0.000903362	0.000903362		0.460862	0.874022
	10.5333	9.70667		0.000674762	0.00119675		0.000903362	0.000903362		0.746945	1.32477
	11.1967	9.55		0.000426057	0.00133402		0.000903362	0.000903362		0.471635	1.47673
	10.4	9.36333		0.000740096	0.00151829		0.000903362	0.000903362		0.819268	1.68071
	10.5533	10.84		0.000665472	0.00054555		0.000903362	0.000903362		0.736662	0.603911
	10.3667	9.99		0.000757395	0.000983355		0.000903362	0.000903362		0.838418	1.08855
	11.42	8.94333		0.000364953	0.00203137		0.000903362	0.000903362		0.403995	2.24867
	11.05	9.23333		0.000471649	0.00166146		0.000903362	0.000903362		0.522104	1.8392
	9.76	8.52333		0.00115331	0.00271782		0.000903362	0.000903362		1.27669	3.00856
	10.7267	9.48333		0.000590135	0.00139712		0.000903362	0.000903362		0.653266	1.54657
	9.81	9.95		0.00111403	0.001011		0.000903362	0.000903362		1.2332	1.11915
	9.4	8.62333		0.00148019	0.00253582		0.000903362	0.000903362		1.63854	2.80709
	10.25	9.18		0.000821188	0.00172403		0.000903362	0.000903362		0.909035	1.90846
	9.88	8.48		0.00106126	0.00280069		0.000903362	0.000903362		1.17479	3.1003
	10.3933	8.33		0.000743524	0.00310756		0.000903362	0.000903362		0.823063	3.44
	10.6567	8.2		0.000619475	0.00340059		0.000903362	0.000903362		0.685744	3.76437
	10.7967	8.62		0.000562185	0.00254168		0.000903362	0.000903362		0.622326	2.81358
										1	1.62866
											0.00178316
